# Supplementary material for: Secondary Genome-Wide Association Study Using Novel Analytical Strategies Disentangle Genetic Components of Cleft Lip and/or Cleft Palate in 1q32.2
Source: PubMed Central journal article supplement (PMC7693579; doi:10.3390/genes11111280), 2020-10-29
Supplement: genes-11-01280-s001.pdf [file genes-11-01280-s001.pdf]

**Table S1 Candidate Genes in the GTEx database**

| <b>Gene</b>    | <b>Locus</b> | <b>Phenotype</b>      | <b>Study Type</b>                          | <b>Reference</b>          |
|----------------|--------------|-----------------------|--------------------------------------------|---------------------------|
| ARHGAP29       | 1p22.1       | CL/P                  | GWAS                                       | [15, 17, 19]              |
| GRHL3          | 1p36.11      | CP                    | GWAS, GWAS replication                     | [14, 18]                  |
| IRF6           | 1q32.2       | CL/P                  | Linkage, GWAS, GWAS replication            | [8, 9, 11–15, 17, 19, 23] |
| TGFA           | 2p13         | CL/P                  | Linkage                                    | [9]                       |
| THADA          | 2p21         | CL/P                  | GWAS meta-analysis                         | [16]                      |
| FAM49A         | 2p24         | CL/P                  | GWAS                                       | [17, 19]                  |
| COL8A1         | 3q12         | CL/P                  | GWAS, GWAS replication, GWAS meta-analysis | [14, 19, 23]              |
| TP63           | 3q27–28      | CL/P                  | Linkage, GWAS                              | [9, 19]                   |
| SHROOM3        | 4q21.1       | CL/P                  | GWAS meta-analysis                         | [19]                      |
| PIK3R1         | 5q13.1       | CL/P                  | GWAS meta-analysis                         | [19]                      |
| NRG1           | 8p12         | CL/P                  | GWAS meta-analysis                         | [19]                      |
| BAALC          | 8q22.3       | CP & multivitamins    | GWAS X E                                   | [20]                      |
| SMC2           | 9q31.1       | CP & maternal alcohol | GWAS X E                                   | [20]                      |
| TBK1           | 12q14        | CP & maternal smoking | GWAS X E                                   | [20]                      |
| KRT18          | 12q13.13     | CL/P                  | GWAS meta-analysis                         | [19]                      |
| PAX9<br>TGFB3  | 14q21–24     | CL/P                  | Linkage                                    | [8, 9]                    |
| TPM1           | 15q22        | CL/P                  | GWAS meta-analysis                         | [16]                      |
| ARID3B         | 15q24        | CL/P                  | GWAS                                       | [17, 19]                  |
| CREBBP         | 16p13        | CL/P                  | GWAS                                       | [27]                      |
| CRISPLD2       | 16q24        | CL/P                  | Linkage                                    | [9]                       |
| WNT9B<br>GOSR2 | 17q21.32     | CP                    | GWAS meta-analysis                         | [19]                      |
| TANC2          | 17q23.2      | CL/P                  | GWAS                                       | [17]                      |
| ZNF236         | 18q22        | CP & maternal smoking | GWAS X E                                   | [20]                      |
| RHPN2          | 19q13.11     | CL/P                  | GWAS                                       | [17]                      |
| MAFB           | 20q12        | CL/P                  | GWAS                                       | [15, 17, 19]              |

**Table S2 Results with suggestive evidence of association from the gene-based association study**

| <b>Gene</b>                   | <b>Ensembl Transcript ID</b> | <b>Chr; Pos</b>             | <b>Beta (S.E.)</b> | <b>z</b> | <b>p-value</b> |
|-------------------------------|------------------------------|-----------------------------|--------------------|----------|----------------|
| <i>Whole Blood</i>            |                              |                             |                    |          |                |
| <i>IRGM</i>                   | ENSG00000237693.4            | 5; 150,846,523-150,900,736  | -3.1560 (0.7636)   | -4.1328  | 3.58E-05       |
| <i>OSBPL11</i>                | ENSG00000144909.7            | 3; 125,528,858-125,595,090  | -2.0234 (0.4949)   | -4.0887  | 4.34E-05       |
| <i>SYCE3</i>                  | ENSG00000217442.3            | 22; 50,551,112-50,562,905   | 3.3258 (0.8238)    | 4.0371   | 5.41E-05       |
| <i>ALDH5A1</i>                | ENSG00000112294.8            | 6; 24,494,852-24,537,207    | -1.8371 (0.4635)   | -3.9633  | 7.39E-05       |
| <i>PRSS45</i>                 | ENSG00000188086.8            | 3;46,742,092-46,744,755     | 2.9393 (0.7508)    | 3.9150   | 9.04E-05       |
| <i>Skeletal Muscle</i>        |                              |                             |                    |          |                |
| <i>ATP6V1D</i>                | ENSG00000100554.7            | 14; 67,294,371-67,360,265   | 2.4795 (0.5800)    | 4.2750   | 1.91E-05       |
| <i>HSD17B12</i>               | ENSG00000149084.7            | 11; 43,680,558-43,856,617   | -0.4123 (0.0991)   | -4.1609  | 3.17E-05       |
| <i>MIF-AS1</i>                | ENSG00000218537.1            | 22; 23,894,426-23,898,930   | 0.7923 (0.1948)    | 4.0666   | 4.77E-05       |
| <i>CD151</i>                  | ENSG00000177697.13           | 11; 832,843-839,831         | -0.718 (0.1769)    | -4.0581  | 4.95E-05       |
| <i>SQOR</i>                   | ENSG00000137767.9            | 15; 45,631,148-45,691,294   | -2.9416 (0.7321)   | -4.0179  | 5.87E-05       |
| <i>LYSMD1</i>                 | ENSG00000163155.7            | 1; 151,159,748-151,165,948  | 1.7668 (0.4436)    | 3.9829   | 6.81E-05       |
| <i>DHX30</i>                  | ENSG00000132153.10           | 3; 47,802,909-47,850,195    | 6.5430 (1.6673)    | 3.9242   | 8.70E-05       |
| <i>Adipose (Subcutaneous)</i> |                              |                             |                    |          |                |
| <i>ALX4</i>                   | ENSG00000052850.5            | 11; 44,260,444-44,310,166   | -0.9276 (0.2179)   | -4.2564  | 2.08E-05       |
| <i>KDM1B</i>                  | ENSG00000165097.9            | 6; 18,155,329-18,223,853    | -1.4586 (0.3619)   | -4.0300  | 5.58E-05       |
| <i>SFSWAP</i>                 | ENSG00000061936.5            | 12; 131,711,081-131,799,737 | -2.0699 (0.5166)   | -4.0065  | 6.16E-05       |
| <i>GSTT2B</i>                 | ENSG00000133433.6            | 22; 23,957,414-23,961,186   | -1.0478 (0.2674)   | -3.9185  | 8.91E-05       |
| <i>Adipose (Visceral)</i>     |                              |                             |                    |          |                |
| <i>MX2</i>                    | ENSG00000183486.8            | 21; 41,361,943-41,409,390   | -2.0284 (0.4610)   | -4.4001  | 1.08E-05       |
| <i>GSTP1</i>                  | ENSG00000084207.11           | 11; 67,583,595-67,586,656   | 1.8047 (0.4145)    | 4.3535   | 1.34E-05       |
| <i>ADAMTS13</i>               | ENSG00000160323.14           | 9; 33,414,358-133,459,402   | -1.2160 (0.3068)   | -3.9634  | 7.39E-05       |
| <i>HSD17B12</i>               | ENSG00000149084.7            | 11; 43,680,558-43,856,617   | -0.3960 (0.1005)   | -3.9410  | 8.11E-05       |
| <i>CNTNAP1</i>                | ENSG00000108797.7            | 17; 42,682,613-42,699,814   | -1.1957 (0.3065)   | -3.9012  | 9.57E-05       |

**Chr: Chromosome, Pos: Position (basepair; bp)**

**Table S3 Candidate Gene Study Using Predicted Expression Levels**

| Gene                          | Transcript ID   | Chr; Pos                   | Beta (SE)      | z     | p       |
|-------------------------------|-----------------|----------------------------|----------------|-------|---------|
| <b>Whole Blood</b>            |                 |                            |                |       |         |
| <i>ARID3B</i>                 | ENSG00000179361 | 15;74,541,177-74,598,131   | -1.54 (0.59)   | -2.61 | 0.0090  |
| <i>CRISPLD2</i>               | ENSG00000103196 | 16;84,819,984-84,920,768   | 0.64 (0.51)    | 1.27  | 0.2033  |
| <i>TBK1</i>                   | ENSG00000183735 | 12;64,451,880-64,502,108   | -0.48 (0.41)   | -1.16 | 0.2448  |
| <i>IRF6</i>                   | ENSG00000117595 | 1;209,785,623-209,806,175  | 0.17 (0.16)    | 1.07  | 0.2858  |
| <i>SMC2</i>                   | ENSG00000136824 | 9;104,094,260-104,141,417  | 0.44 (0.46)    | 0.96  | 0.3348  |
| <i>BAALC</i>                  | ENSG00000164929 | 8;103,140,710-103,230,305  | 0.40 (0.43)    | 0.92  | 0.3509  |
| <i>TGFB3</i>                  | ENSG00000119699 | 14;75,958,099-75,982,991   | -0.27 (0.36)   | -0.73 | 0.4658  |
| <i>TGFA</i>                   | ENSG00000163235 | 2;70,447,280-70,554,193    | 0.27 (0.37)    | 0.73  | 0.4662  |
| <i>KRT18</i>                  | ENSG00000111057 | 12;52,948,871-52,952,901   | -2.99(10.41)   | -0.29 | 0.7743  |
| <i>TANC2</i>                  | ENSG00000170921 | 17;63,009,556-63,427,699   | 1.94 (8.53)    | 0.23  | 0.8200  |
| <i>NRG1</i>                   | ENSG00000157168 | 8;31,639,386-32,767,959    | -0.02 (0.22)   | -0.11 | 0.9104  |
| <i>ZNF236</i>                 | ENSG00000130856 | 18;76,822,607-76,970,727   | -0.02 (0.49)   | -0.05 | 0.9578  |
| <b>Skeletal Muscle</b>        |                 |                            |                |       |         |
| <i>RHPN2</i>                  | ENSG00000131941 | 19; 32,978,593-33,064,888  | -1.9960 (0.64) | -3.11 | 0.0019* |
| <i>SHROOM3</i>                | ENSG00000138771 | 4; 76,435,100-76,783,253   | 0.6720 (0.27)  | 2.46  | 0.0138  |
| <i>PIK3R1</i>                 | ENSG00000145675 | 5; 68,215,720-68,301,821   | 1.2415 (0.51)  | 2.45  | 0.0143  |
| <i>TBK1</i>                   | ENSG00000183735 | 12; 64,451,880-64,502,108  | -0.5811 (0.37) | -1.56 | 0.1193  |
| <i>COL8A1</i>                 | ENSG00000144810 | 3; 99,638,475-99,799,226   | 0.2524 (0.25)  | 0.99  | 0.3205  |
| <i>TGFA</i>                   | ENSG00000163235 | 2; 70,447,280-70,554,193   | 0.3384 (0.37)  | 0.91  | 0.3613  |
| <i>TANC2</i>                  | ENSG00000170921 | 17; 63,009,556-63,427,699  | -0.3166 (0.58) | -0.57 | 0.5701  |
| <i>ZNF236</i>                 | ENSG00000130856 | 18; 76,822,607-76,970,727  | -0.4588 (0.84) | -0.54 | 0.5866  |
| <i>GOSR2</i>                  | ENSG00000108433 | 17; 46,923,075-46,975,524  | -0.1294 (0.26) | -0.51 | 0.6119  |
| <i>SMC2</i>                   | ENSG00000136824 | 9; 104,094,260-104,141,417 | -0.4881 (1.05) | -0.46 | 0.6431  |
| <i>MAFB</i>                   | ENSG00000204103 | 20; 40,685,848-40,689,240  | 0.1451 (0.65)  | 0.23  | 0.8237  |
| <b>Adipose (Subcutaneous)</b> |                 |                            |                |       |         |
| <i>RHPN2</i>                  | ENSG00000131941 | 19; 32,978,593-33,064,888  | -0.61 (0.19)   | -3.19 | 0.0014* |
| <i>IRF6</i>                   | ENSG00000117595 | 1; 209,785,623-209,806,175 | 0.34 (0.20)    | 1.69  | 0.0910  |
| <i>TP63</i>                   | ENSG00000073282 | 3; 189,631,416-189,897,279 | -0.36 (0.39)   | -0.94 | 0.3497  |
| <i>THADA</i>                  | ENSG00000115970 | 2; 43,230,836-43,596,046   | 0.32 (0.48)    | 0.67  | 0.5014  |
| <i>TGFB3</i>                  | ENSG00000119699 | 14; 75,958,099-75,982,991  | -0.18 (0.42)   | -0.44 | 0.6582  |
| <i>TPM1</i>                   | ENSG00000140416 | 15; 63,042,632-63,071,915  | 0.07 (0.22)    | 0.34  | 0.7336  |
| <i>KRT18</i>                  | ENSG00000111057 | 12; 52,948,871-52,952,901  | -261.49 (2.18) | 3.43  | NA      |
| <b>Adipose (Visceral)</b>     |                 |                            |                |       |         |
| <i>SHROOM3</i>                | ENSG00000138771 | 4; 76,435,100-76,783,253   | -1.28 (0.58)   | -2.22 | 0.0262  |
| <i>ARHGAP29</i>               | ENSG00000137962 | 1; 94,148,988-94,275,068   | 0.29 (0.22)    | 1.34  | 0.1808  |
| <i>ZNF236</i>                 | ENSG00000130856 | 18; 76,822,607-76,970,727  | -0.45 (0.39)   | -1.15 | 0.2495  |
| <i>TPM1</i>                   | ENSG00000140416 | 15; 63,042,632-63,071,915  | -0.11 (0.41)   | -0.27 | 0.7847  |
| <i>THADA</i>                  | ENSG00000115970 | 2; 43,230,836-43,596,046   | -0.14 (0.51)   | -0.27 | 0.7885  |
| <i>IRF6</i>                   | ENSG00000117595 | 1; 209,785,623-209,806,175 | 0.04 (0.27)    | 0.16  | 0.8708  |
| <i>COL8A1</i>                 | ENSG00000144810 | 3; 99,638,475-99,799,226   | -0.0064 (0.31) | -0.02 | 0.9836  |
| <i>SHROOM3</i>                | ENSG00000138771 | 4; 76,435,100-76,783,253   | -1.28 (0.58)   | -2.22 | 0.0262  |

Chr: Chromosome, Pos: Position (basepair; bp)

**Table S4 Alternate Allele Frequencies of the Most Significant Markers from a Series of Conditional GWAS in Sub-populations**

| Step | Marker      | Gene     | Ref allele | Alt allele | African (n=379) | Asian (n=2,017) | Caucasian (n=4,631) | Native American (n=189) | Caucasian and Native American (n=939) | Caucasian, African and Native American (n=2,282) | Total (n=10,542) |
|------|-------------|----------|------------|------------|-----------------|-----------------|---------------------|-------------------------|---------------------------------------|--------------------------------------------------|------------------|
| 1    | rs72728755  | 8q24     | T          | A          | 0.15            | 0.03            | 0.23                | 0.04                    | 0.06                                  | 0.19                                             | 0.16             |
| 2    | rs7552      | FAM49A   | A          | G          | 0.68            | 0.74            | 0.34                | 0.73                    | 0.63                                  | 0.52                                             | 0.50             |
| 3    | rs2235370   | TRAF3IP3 | C          | A          | -               | 0.18            | 0.04                | 0.40                    | 0.35                                  | 0.18                                             | 0.13             |
| 4    | rs16957821  | NTN1     | C          | G          | 0.41            | 0.18            | 0.19                | 0.35                    | 0.37                                  | 0.30                                             | 0.24             |
| 5    | rs12600562  | LRRC37A2 | G          | T          | 0.48            | 0.38            | 0.59                | 0.46                    | 0.52                                  | 0.55                                             | 0.53             |
| 6    | rs12543318  |          | C          | A          | 0.68            | 0.44            | 0.62                | 0.49                    | 0.48                                  | 0.49                                             | 0.55             |
| 7    | rs3845903   | LRIG1    | C          | T          | 0.80            | 0.94            | -                   | 0.99                    | 0.98                                  | 0.97                                             | 0.97             |
| 8    | rs10778143  | CHPT1    | A          | C          | 0.63            | 0.59            | 0.25                | 0.20                    | 0.21                                  | 0.25                                             | 0.33             |
| 9    | rs6929507   | GMDS     | T          | C          | 0.15            | 0.002           | -                   | -                       | 0.007                                 | 0.02                                             | 0.01             |
| 10   | rs138322543 | TRMO     | CCACC<br>A | C          | 0.77            | 0.91            | 0.66                | 0.66                    | 0.67                                  | 0.72                                             | 0.73             |

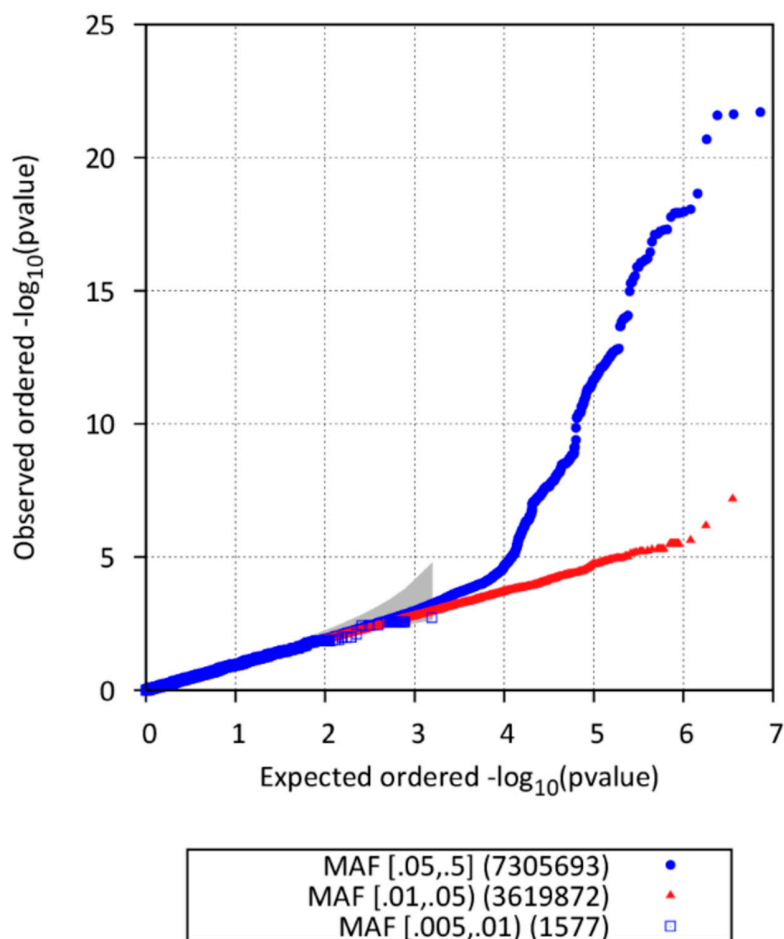

**Figure S1 Quantile-quantile (QQ) plot of OFC GWAS using EMMAX model** The observed (Y-axis)  $-\log_{10}$  (p-values) are plotted against the expected (X-axis)  $-\log_{10}$  (p-values). Common SNPs (minor allele frequency (MAF) greater than 0.05) are plotted with blue filled dots; rare SNPs (MAF smaller than 0.05 and greater than or equal to 0.01) with red filled triangles; very rare SNPs (MAF smaller than 0.01 and greater than or equal to 0.005) with blue hollow squares. Numbers of SNPs for each MAF categories are presented in the bottom box. Grey area represents a 95% confidence interval of normal distribution.

---

### Step 1: Conditioned on 8q24

---

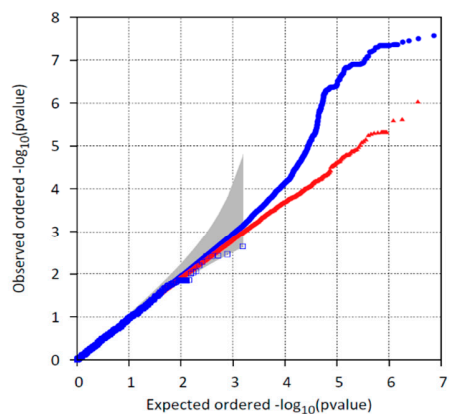

MAF [0.05, 0.5] (7305693) ●  
MAF [0.01, 0.05] (3619872) ▲  
MAF [0.005, 0.01] (1577) ■

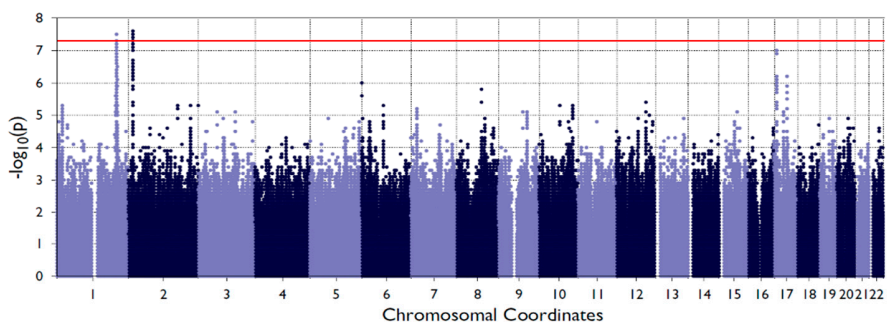

---

### Step 2: Conditioned on 8q24 and 2p24.2

---

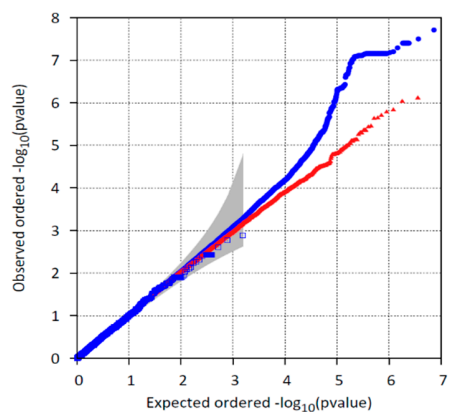

MAF [0.05, 0.5] (7305693) ●  
MAF [0.01, 0.05] (3619872) ▲  
MAF [0.005, 0.01] (1577) ■

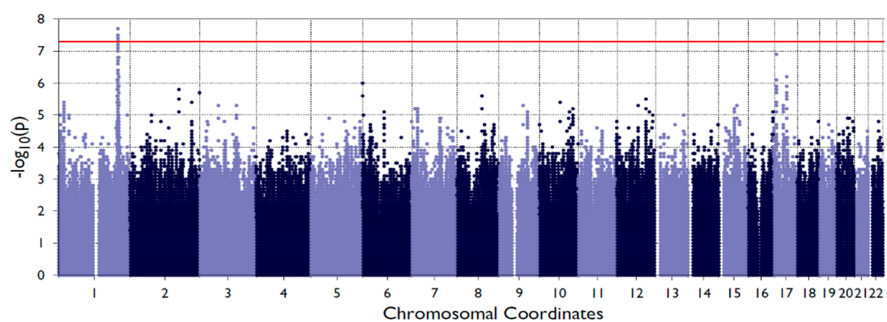

---

### Step 3: Conditioned on 8q24, 2p24.2 and 1q32.2

---

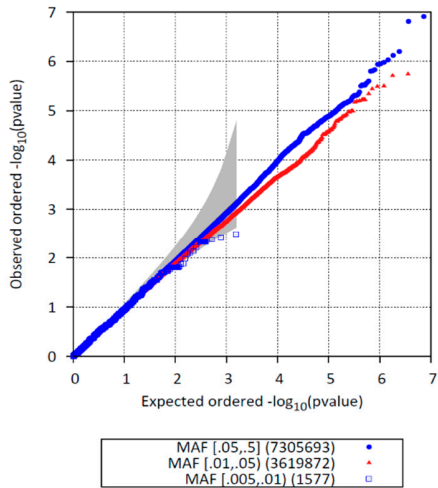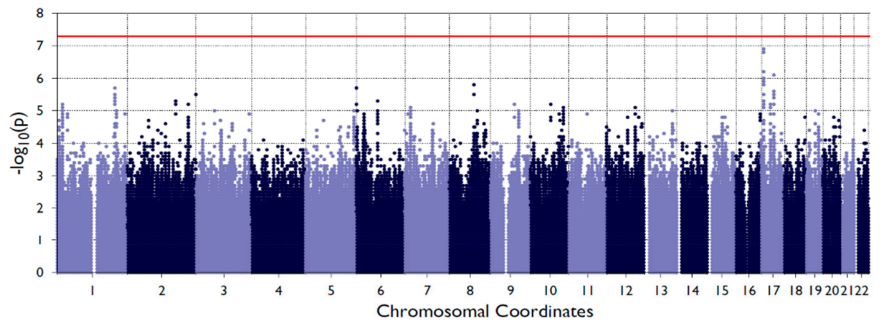

#### Step 4: Conditioned on 8q24, 2p24.2, 1q32.2 and 17p13.1

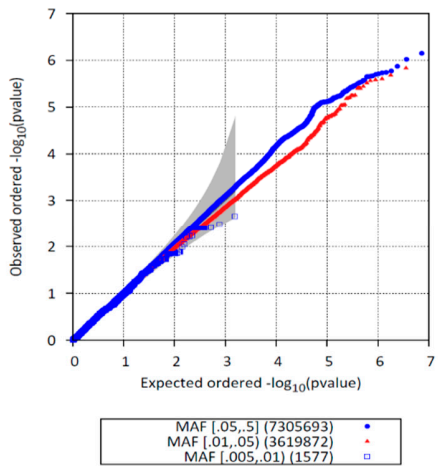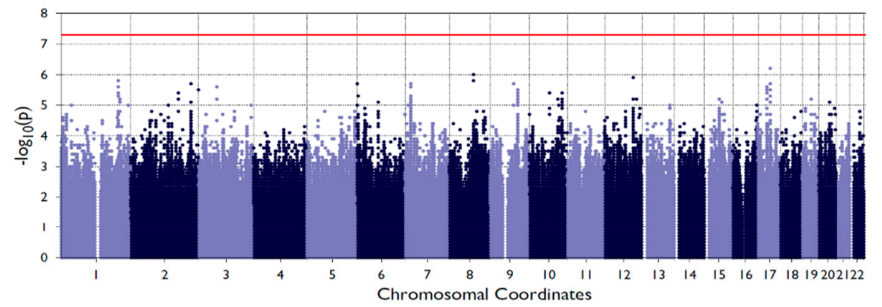

#### Step 5: Conditioned on 8q24, 2p24.2, 1q32.2, 17p13.1 and 17q21.31

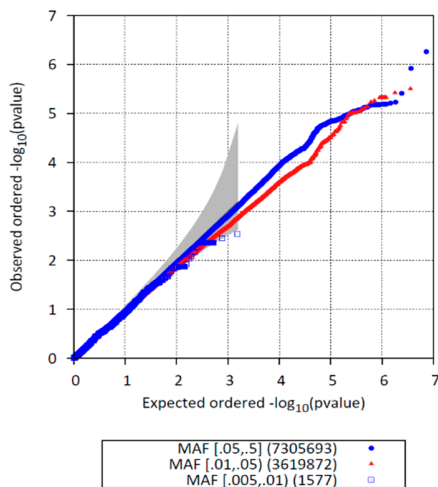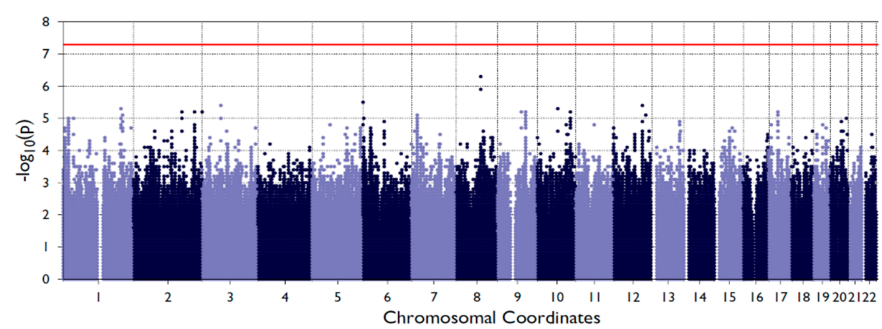

#### Step 6: Conditioned on 8q24, 2p24.2, 1q32.2, 17p13.1, 17q21.31 and 8q21

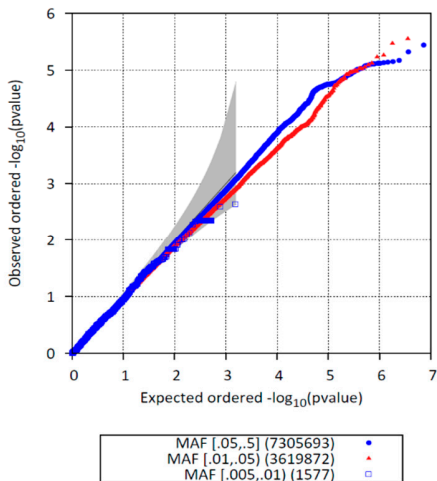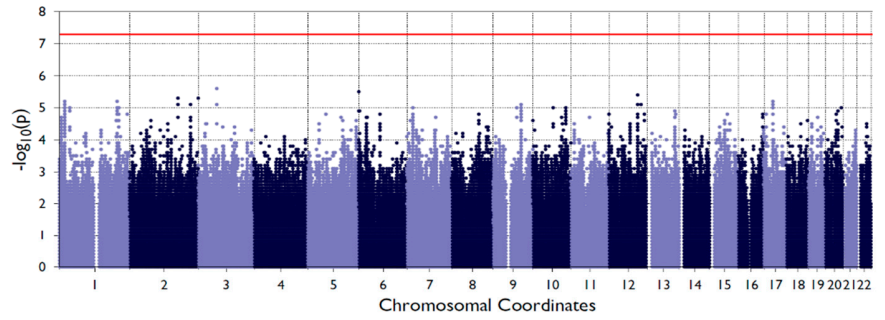

### Step 7: Conditioned on 8q24, 2p24.2, 1q32.2, 17p13.1, 17q21.31, 8q21 and 3p14.1

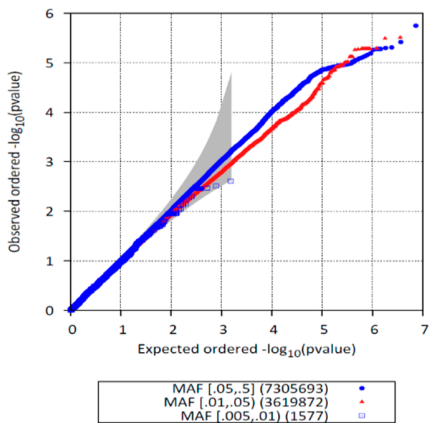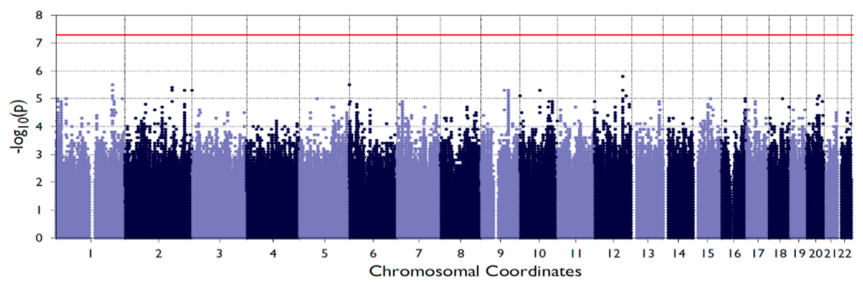

### Step 8: Conditioned on 8q24, 2p24.2, 1q32.2, 17p13.1, 17q21.31, 8q21, 3p14.1 and 12q23.2

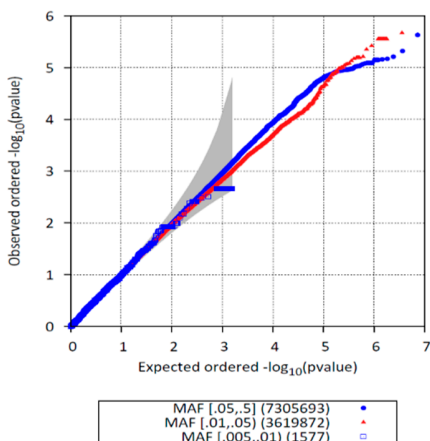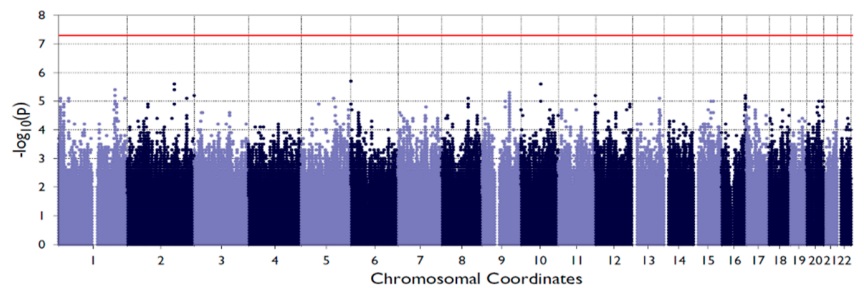

### Step 9: Conditioned on 8q24, 2p24.2, 1q32.2, 17p13.1, 17q21.31, 8q21, 3p14.1, 12q23.2 and 6p25.3



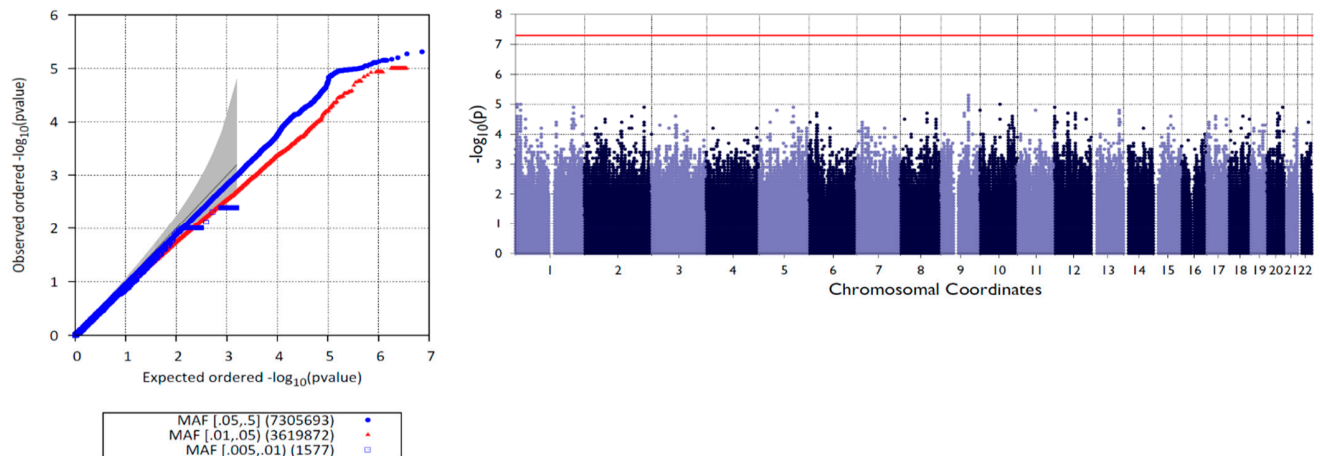

**Figure S2 QQ Plots and Manhattan Plots from Nine Sequential Conditional GWASs** At each step of 9 sequential GWASs, the observed (Y-axis)  $-\log_{10}$  (p-values) are plotted against the expected (X-axis)  $-\log_{10}$  (p-values). Manhattan plots show SNPs with  $-\log_{10}(\text{p-value})$  on y-axis along the x-axis of chromosomal position.

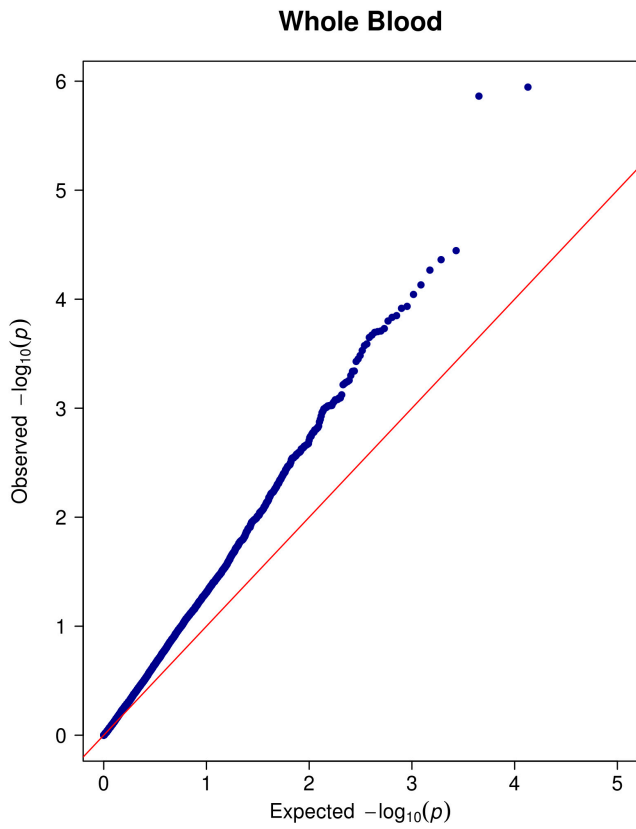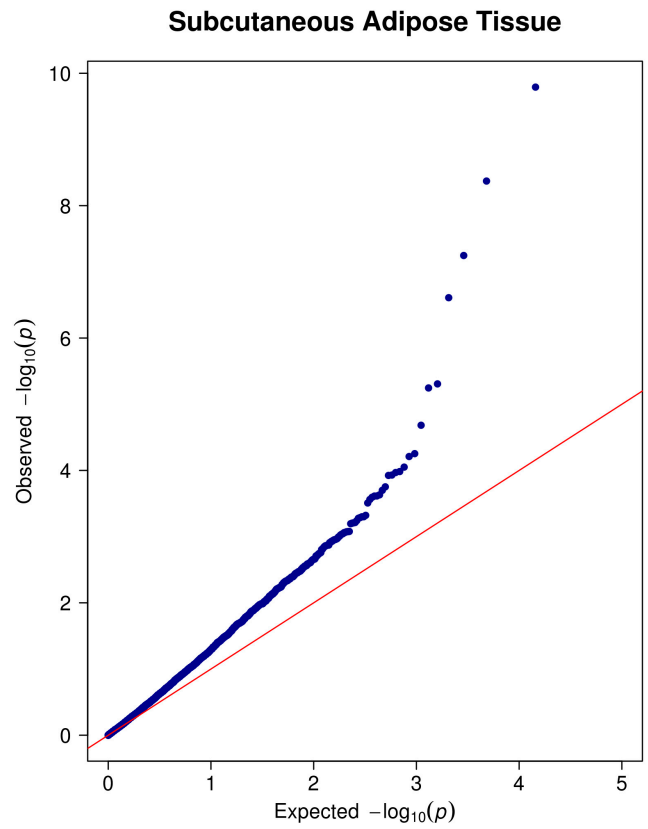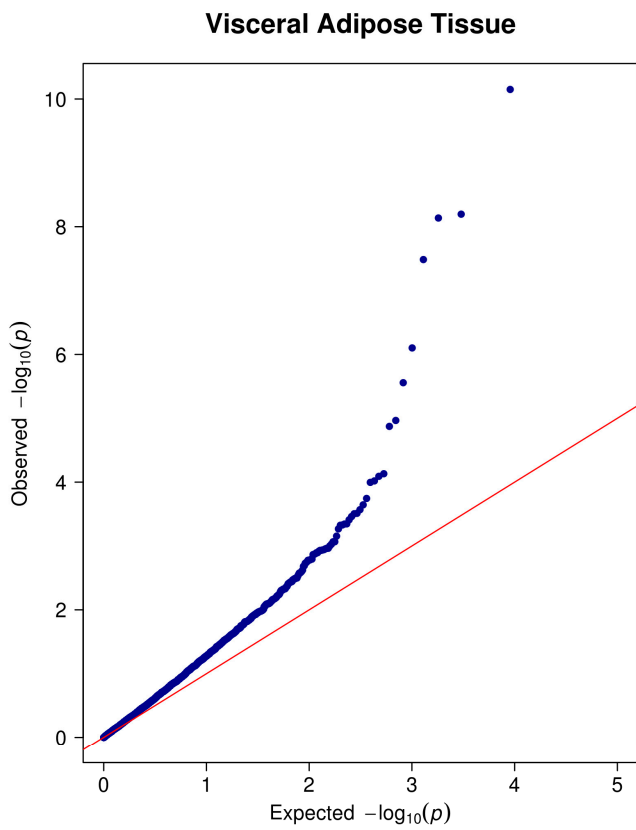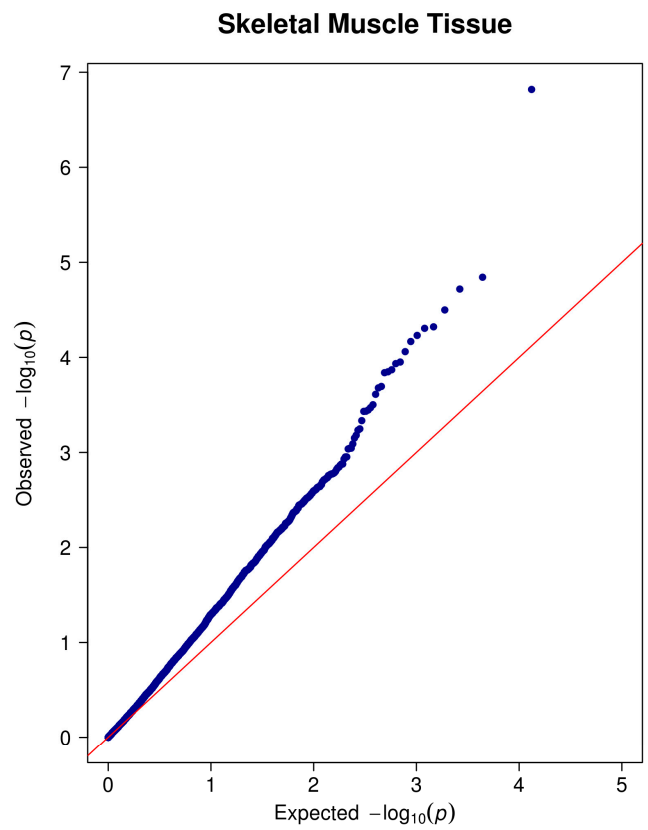

**Figure S3** QQ Plots of OFC TWASs Using Predicted Expression Levels in Four Tissues The observed (Y-axis)  $-\log_{10}(p)$  values are plotted against the expected (X-axis)  $-\log_{10}(p)$  values.
